# Supplementary material
Source: PubMed Central journal article supplement (PMC3294859)
Supplement: supp_194.6.1533_SuppMaterial.pdf [file supp_194.6.1533_SuppMaterial.pdf]

## Supplemental Material

The role of long and short replication initiation proteins in the fate of IncP-1 plasmids

Yano H, Dekert GE, Rogers LM, Top EM.

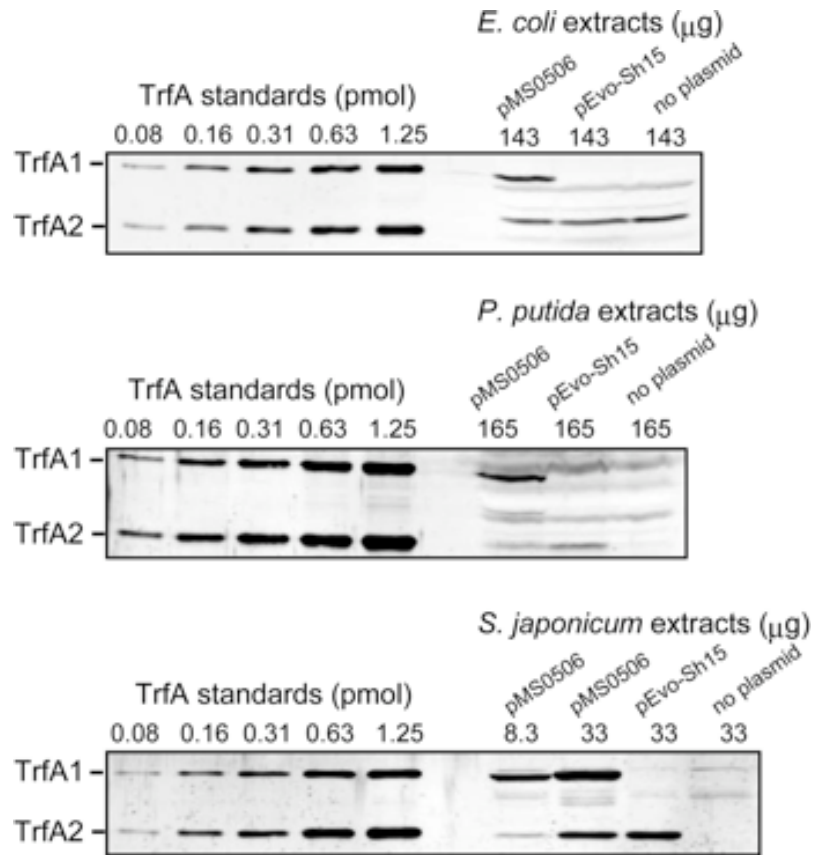

**Fig. S1.** Effect of the frame-shift mutation in pEvo-Sh15 on production of TrfA1 and -2. Quantity of cell extracts was normalized for total protein content using the Bradford assay. Individual TrfA levels are summarized in Table S2.

**Table S1.** Oligonucleotides used in this study.

| Name                 | Sequence (5' – 3')                                    | Purpose                                                                                       |
|----------------------|-------------------------------------------------------|-----------------------------------------------------------------------------------------------|
| SjaporiCF            | CGTCAACATCATCGTAACCG                                  | Cloning of the SJA-00140 region of the <i>S. japonicum</i> chromosome I                       |
| SjaporiCR            | TGAAGATATTTTGGCCCCAG                                  | Cloning of the SJA-00140 region of the <i>S. japonicum</i> chromosome I                       |
| EcolioriCF           | TACGGCATCCTGAGGGAATTCGA                               | Cloning of the <i>atpB</i> region of the <i>E. coli</i> chromosome                            |
| E.colioriCR          | GTCTTAAGGGGACTGGAGCATGCA                              | Cloning of the <i>atpB</i> region of the <i>E. coli</i> chromosome                            |
| PpuoriCF             | GGTGACGAATTCCAGCAGGAA                                 | Cloning of the <i>atpB-parB</i> region of the <i>P. putida</i> chromosome                     |
| PpuoriCR             | CTGCAACAGGAATTCGAACTCACC                              | Cloning of the <i>atpB-parB</i> region of the <i>P. putida</i> chromosome                     |
| JMPoriCF             | TCACGTTCTGCGTCAAAAATC                                 | Cloning of the <i>parB</i> region of the <i>C. necator</i> chromosome I                       |
| JMPoriCR             | GATCCGCGAATTCCAGTTTA                                  | Cloning of the <i>parB</i> region of the <i>C. necator</i> chromosome I                       |
| pBP136kleEF          | CGTCTCGATATACAAGCCCA                                  | qPCR, amplification of the 158 bp fragment in <i>kleE</i> of pBP136                           |
| pBP136kleER          | ATTGCACCCATAAACTCCA                                   | qPCR, amplification of the 158 bp fragment in <i>kleE</i> of pBP136                           |
| tetAF                | GTGAAACCCAACATACCCCT                                  | qPCR, amplification of 170 bp fragment in <i>tetA</i> of pHY872 derivatives                   |
| tetAR                | AATTGCACCAACGCATACAG                                  | qPCR, amplification of 170 bp fragment in <i>tetA</i> of pHY872 derivatives                   |
| EcoliatpF            | GTCGGTCCAGGTCTTCATTT                                  | qPCR, amplification of the 157 bp fragment in <i>atpB</i> of <i>E. coli</i>                   |
| EcoliatpR            | TGCACACGGTAATCTGGAAT                                  | qPCR, amplification of the 157 bp fragment in <i>atpB</i> of <i>E. coli</i>                   |
| PpuparBF             | CGCAGAGTATAGGGGTGGAT                                  | qPCR, amplification of the 150 bp fragment in <i>parB</i> of <i>P. putida</i>                 |
| PpuparBR             | GCAAAGGCCAGTTGGTTATT                                  | qPCR, amplification of the 150 bp fragment in <i>atpB</i> of <i>P. putida</i>                 |
| Sjap0140F            | TCAACGACAAGATCAGCGAC                                  | qPCR, amplification of the 131 bp fragment in <i>parB</i> of <i>S. japonicum</i> chromosome I |
| Sjap0140R            | GAAGCGGTCGAGATTGTAGC                                  | qPCR, amplification of the 131 bp fragment in <i>parB</i> of <i>S. japonicum</i> chromosome I |
| parBJMPF             | CGACAATTCTTCTCCAGCC                                   | qPCR, amplification of the 134 bp fragment in <i>parB</i> of <i>C. necator</i> chromosome I   |
| parBJMPR             | TCAACAAGCGGCTATCAGTG                                  | qPCR, amplification of the 134 bp fragment in <i>parB</i> of <i>C. necator</i> chromosome I   |
| SacI-SD-pBP136trfA1F | AATTGAGCTCAAGGAGGTAATACACCAT<br>GACGAACAACGAGTTCAACGA | Cloning of <i>trfA1</i> into pHSG399                                                          |
| SacI-SD-pBP136trfA2F | AATTGAGCTCAAGGAGGTAATACACCAT<br>GGCGACCAAGAAGCGAAC    | Cloning of <i>trfA1</i> and <i>trfA2</i> into pHSG399                                         |
| Hind-pBP136trfAR     | AATTAAGCTTATTACCGCTTGCAATGCAC<br>CAGGT                | Cloning of <i>trfA2</i> to pHSG399                                                            |
| trfAM124LF           | CTGGCGACCAAGAAGCGAACG                                 | Introducing M124L mutation to <i>trfA1</i>                                                    |
| trfAM124LR           | CGCACTACTCCGTTGTCTCTG                                 | Introducing M124L mutation to <i>trfA1</i>                                                    |
| trfA1-F-NdeI         | TTTTTCATATGACGAACAACGAGTTCAA                          | Cloning of <i>trfA1</i> into pTXB1                                                            |
| trfA2-F-NdeI         | TTTTTCATATGGCGACCAAGAAGCGAAC                          | Cloning of <i>trfA2</i> into pTXB1                                                            |
| trfA-R-Xho           | TTTTTCTCGAGTCACCGCTTGCAATGCACC<br>A                   | Cloning of <i>trfA1</i> and <i>trfA2</i> into pTXB1                                           |
| Eco-pBP136iteron8R   | AATTGAATTCCGGGCTTGTGGATCGTTTTG                        | Cloning of <i>oriV</i> <sub>pBP136</sub> to pJP5608                                           |
| Sph-pBP136oriVF      | AATTGCATGCCGGTGGGATCGAGAAGG<br>G                      | Cloning of <i>oriV</i> <sub>pBP136</sub> to pJP5608                                           |
| Sph-pJPlacPdel       | AATTGCATGCCGCTCGGCCAGTCCCTG                           | Deletion of <i>lac</i> promoter on the pJP5608 derivative                                     |

|                                   |                                                                                      |                                                                                                                            |
|-----------------------------------|--------------------------------------------------------------------------------------|----------------------------------------------------------------------------------------------------------------------------|
| Tn7R109 <sup>a</sup>              | CAGCATAACTGGACTGATTCAG                                                               | Confirmation of Tn7 insertion to attTn7 of <i>E. coli</i> , <i>P. putida</i> , <i>S. japonicum</i> , <i>C. necator</i>     |
| Ecoliglms<br>Pseglms <sup>a</sup> | CATGCACATCATCGAGATGCC<br>AATCTGGCCAAGTCGGTGAC                                        | Confirmation of Tn7 insertion to attTn7 of <i>E. coli</i><br>Confirmation of Tn7 insertion into attTn7 of <i>P. putida</i> |
| Sjap_glmSDN                       | CATGGCGACCATCACCATGC                                                                 | Confirmation of Tn7 insertion into attTn7 of <i>S. japonicum</i>                                                           |
| Cupriavid_glmSDN                  | AACCTGGCGAAGTCGGTGAC<br>TGAGACAATAACCCTGATAAATGCTTCA<br>ATAATATTGAAAAAGGAAGAGTATGGAG | Confirmation of Tn7 insertion into attTn7 of <i>C. necator</i><br>Construction of pBAD24C                                  |
| pBAD24CmF                         | AAAAAATCACTGGATATAC<br>AGGGCGCGTAAATCAATCTAAAGTATAT<br>ATGAGTAACTTGGTCTGACAGTCATCGC  | Construction of pBAD24C                                                                                                    |
| pBAD24CmR                         | AGTACTGTTGTATTC<br>AATTGAATTCACCATGGCGACCAAGAAG<br>CGAAC                             | Cloning of <i>trfA2</i> to pBAD24C                                                                                         |
| EcopBPTrfA2F                      | AATTGAATTCACCATGACGAACAACGAG<br>TTCAACGA                                             | Cloning of <i>trfA1</i> to pBAD24C                                                                                         |
| EcopBPTrfA1F                      | AATTAAGCTTATTACCGCTTGCAATGCAC<br>CAGGT                                               | Cloning of <i>trfA1</i> and <i>trfA2</i> to pBAD24C                                                                        |
| HindpBPTrfAR                      |                                                                                      |                                                                                                                            |

<sup>a</sup> Primers, Tn7R109 and Pseglms were identical to the primers reported by Lambertsen et al. (2004) in *Environ. Microbiol.* Vol 6: 726-732.

**Table S2.** TrfA levels<sup>a</sup> in three hosts harboring pMS0506 or pEvo-Sh15 in exponential phase.

|                           | TrfA1<br>(fmol/ug) | TrfA2<br>(fmol/ug) | Total TrfA<br>(fmol/ug) | Relative total<br>TrfA levels | Number of<br>samples |
|---------------------------|--------------------|--------------------|-------------------------|-------------------------------|----------------------|
| <i>E. coli</i> BW25113    |                    |                    |                         |                               |                      |
| pMS0506                   | 2.19               | <0.2               | 2.2                     | 1.00                          | N=7                  |
| pEvo-Sh15                 | NA <sup>b</sup>    | <0.5               | <0.5                    | <0.22                         | N=4                  |
| <i>P. putida</i> KT2440   |                    |                    |                         |                               |                      |
| pMS0506                   | 2.09               | 0.23               | 2.3                     | 1.00                          | N=6                  |
| pEvo-Sh15                 | NA                 | 0.48               | 0.5                     | 0.21                          | N=4                  |
| <i>S. japonicum</i> UT26S |                    |                    |                         |                               |                      |
| pMS0506                   | 39.84              | 12.52              | 52                      | 1.00                          | N=5                  |
| pEvo-Sh15                 | NA                 | 12.61              | 13                      | 0.24                          | N=1                  |

<sup>a</sup> Mean values are shown. Examples of Western blots are shown in Fig. S1.

<sup>b</sup> NA, not applicable
